# Supplementary material for: Development and Characterization of Pharmaceutical Systems Containing Rifampicin
Source: MDPI journal article supplement (doi:10.3390/pharmaceutics15010198), 2023-01-05
Supplement: s1 [file s1]

Supplementary Material:

“Development and characterization of pharmaceutical systems containing rifampicin”

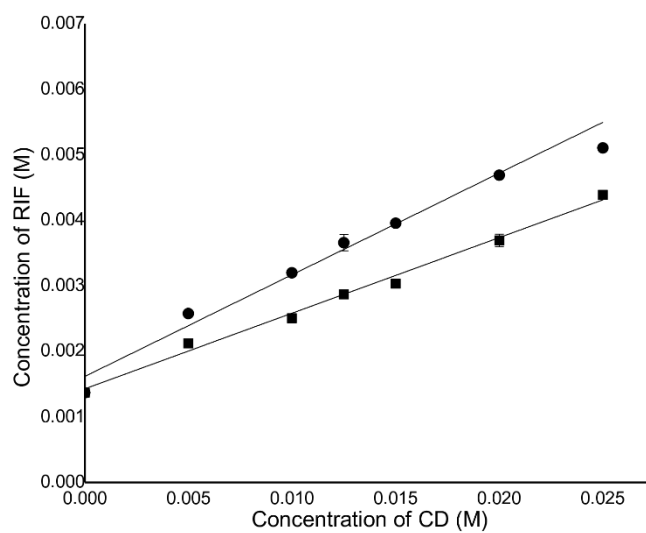

**Figure S1:** Phase solubility diagrams of the binary (RIF:γ-CD, squares) and multicomponent (RIF:γ-CD:ARG, circles) complexes.

---

## 1. Supplementary Material

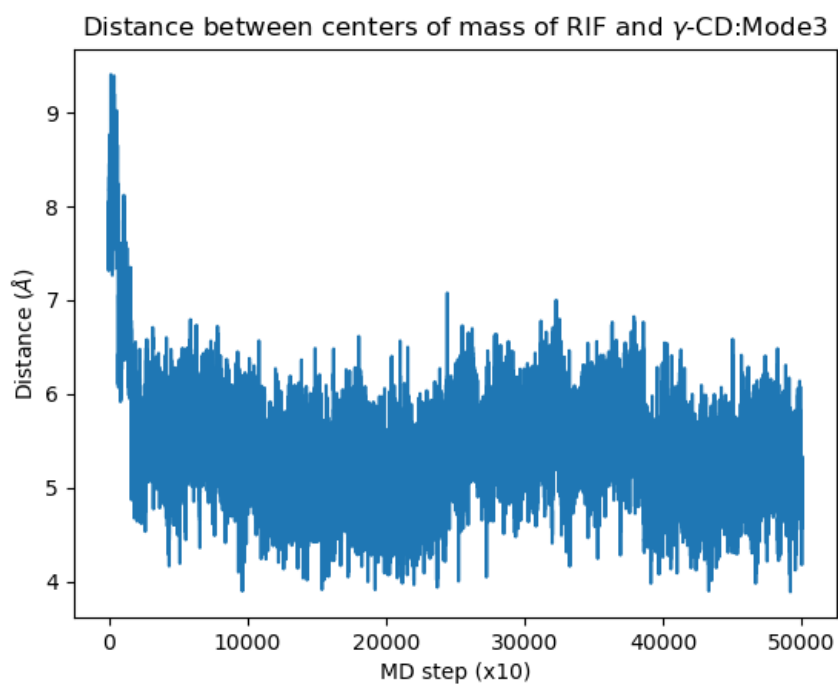

**Figure S2:** Distance between the centers of mass of the guest (RIF) and host ( $\gamma$ -CD) molecules within the MD trajectory corresponding to binding mode-3.

---

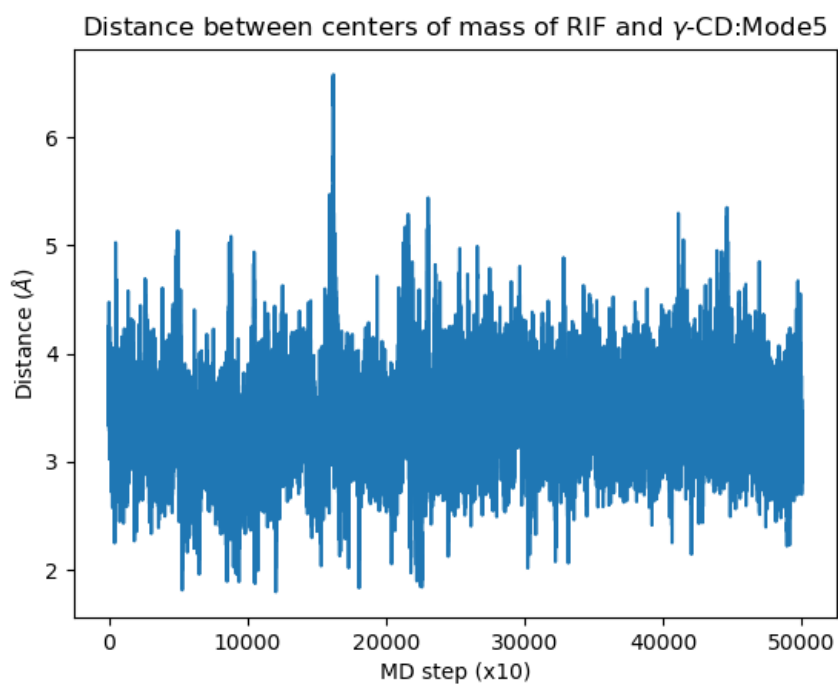

**Figure S3:** Distance between the centers of mass of the guest (RIF) and host ( $\gamma$ -CD) molecules within the MD trajectory corresponding to binding mode-5.

---

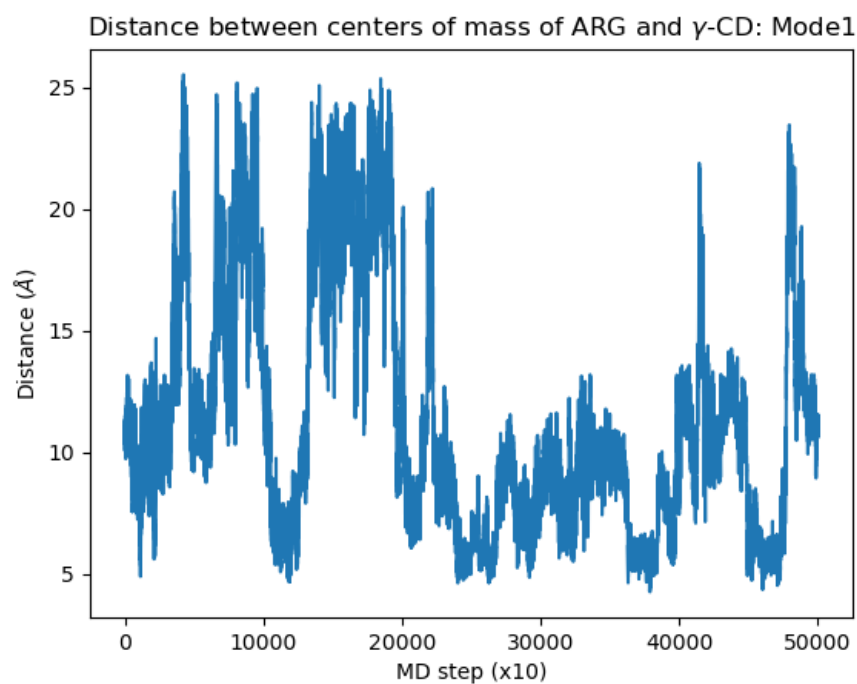

**Figure S4:** Distance between the centers of mass of the guest (ARG) and host ( $\gamma$ -CD) molecules within the MD trajectory corresponding to binding mode-1.

---

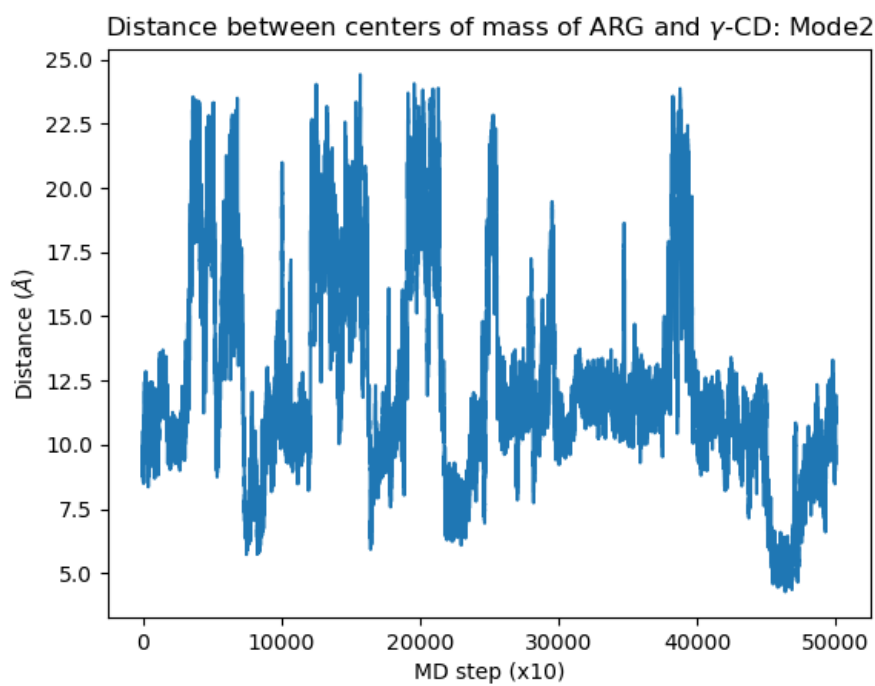

**Figure S5:** Distance between the centers of mass of the guest (ARG) and host ( $\gamma$ -CD) molecules within the MD trajectory corresponding to binding mode-2.

---

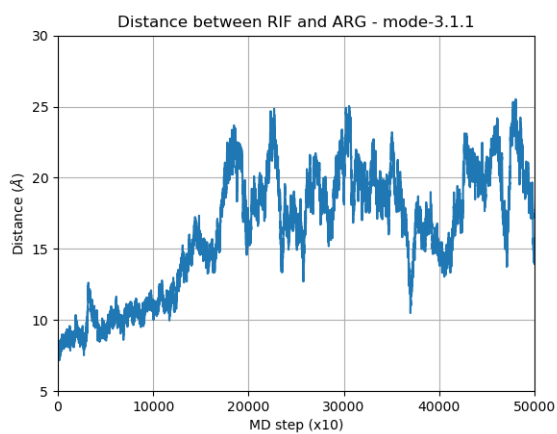

(a) *Distance between RIF and ARG in the ternary complex mode-3.1.1*

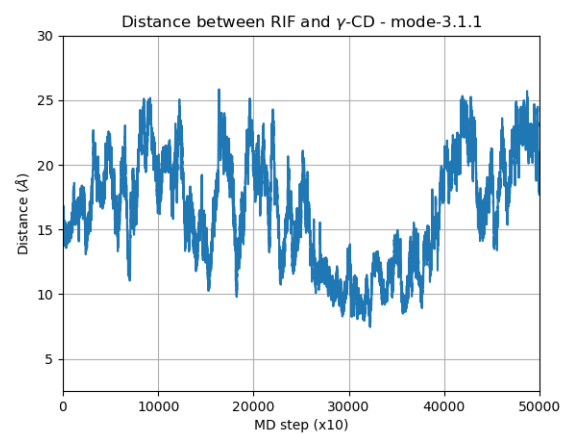

(b) *Distance between RIF and  $\gamma$ -CD in the ternary complex mode-3.1.1*

**Figure S6:** Structural analysis on the formation of the ternary complex mode-3.1.1

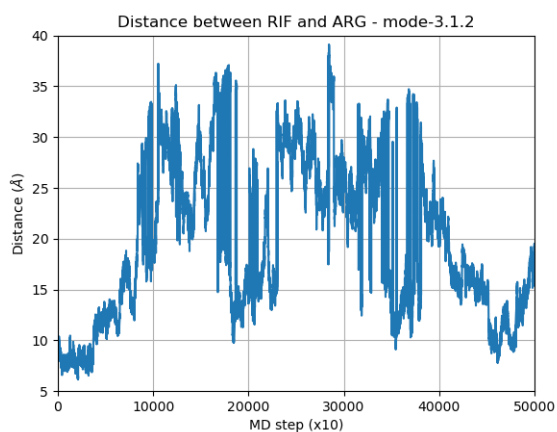

(a) *Distance between RIF and ARG in the ternary complex mode-3.1.2*

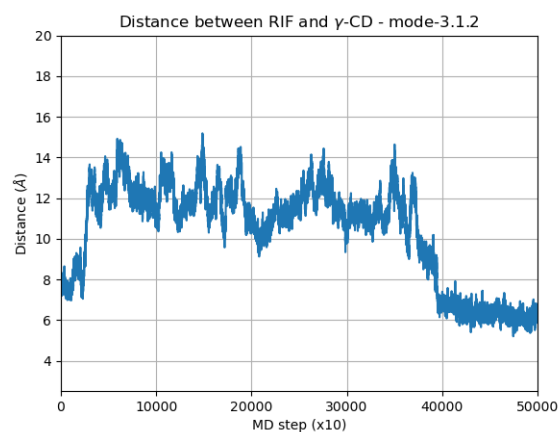

(b) *Distance between RIF and  $\gamma$ -CD in the ternary complex mode-3.1.2*

**Figure S7:** Structural analysis on the formation of the ternary complex mode-3.1.2

---

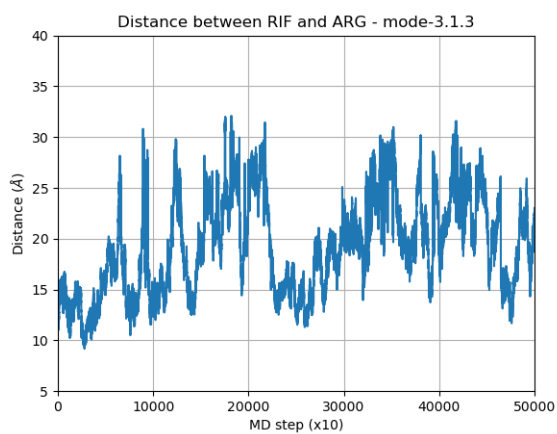

(a) *Distance between RIF and ARG in the ternary complex mode-3.1.3*

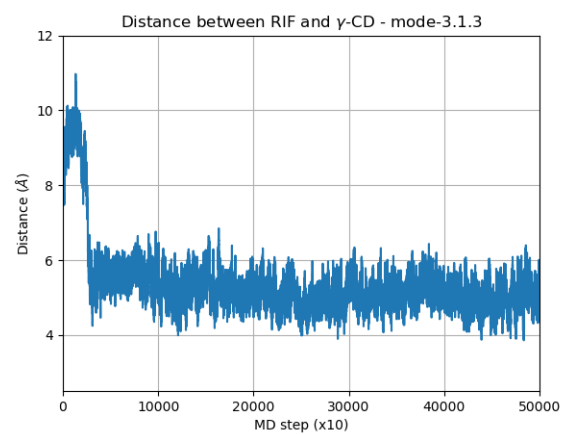

(b) *Distance between RIF and  $\gamma$ -CD in the ternary complex mode-3.1.3*

**Figure S8:** Structural analysis on the formation of the ternary complex mode-3.1.3



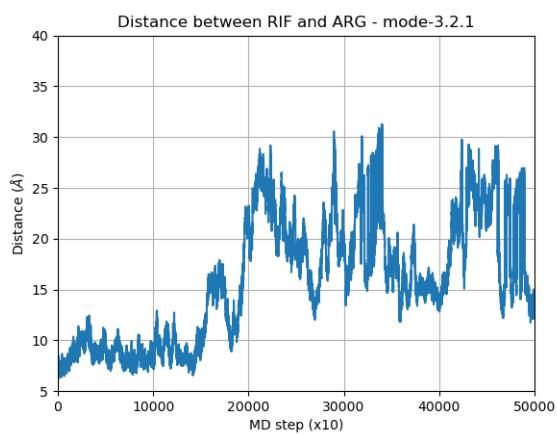

(a) *Distance between RIF and ARG in the ternary complex mode-3.2.1*

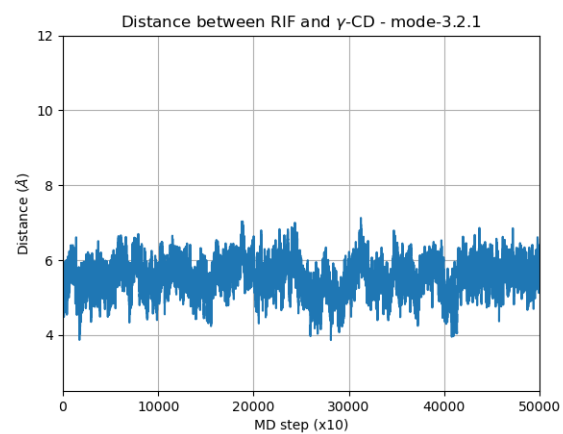

(b) *Distance between RIF and  $\gamma$ -CD in the ternary complex mode-3.2.1*

**Figure S9:** Structural analysis on the formation of the ternary complex mode-3.2.1

---

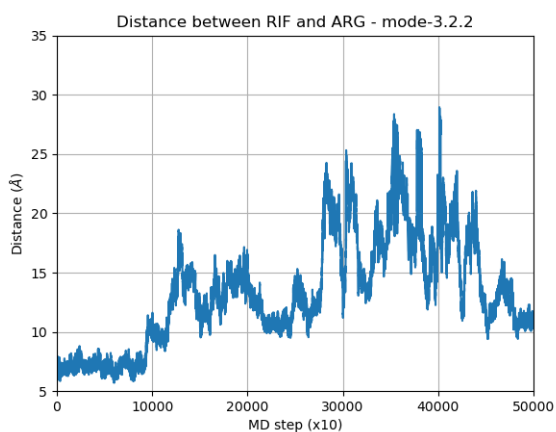

(a) *Distance between RIF and ARG in the ternary complex mode-3.2.2*

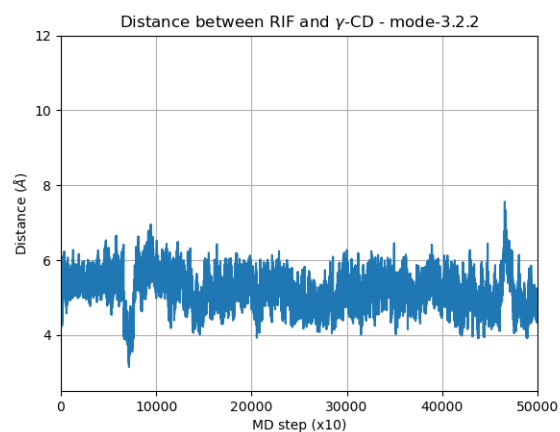

(b) *Distance between RIF and  $\gamma$ -CD in the ternary complex mode-3.2.2*

**Figure S10:** Structural analysis on the formation of the ternary complex mode-3.2.2

---

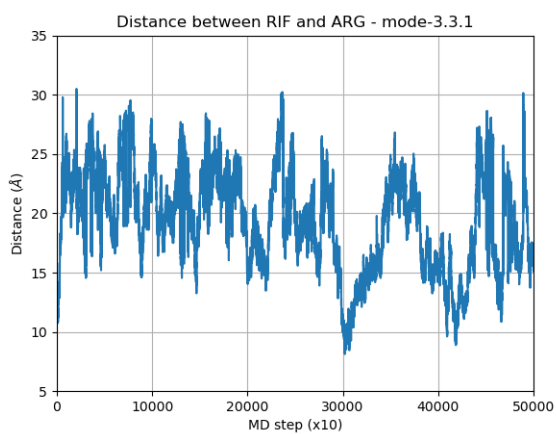

(a) *Distance between RIF and ARG in the ternary complex mode-3.3.1*

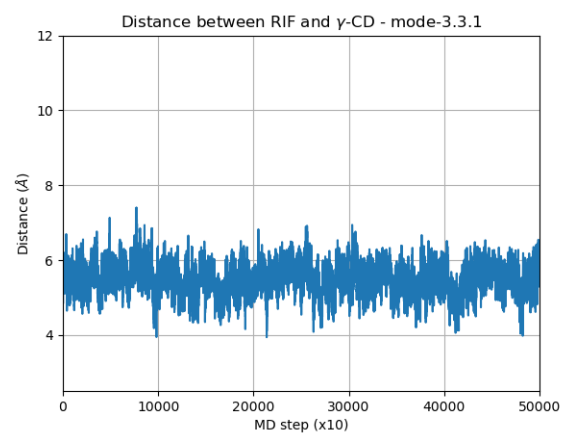

(b) *Distance between RIF and  $\gamma$ -CD in the ternary complex mode-3.3.1*

**Figure S11:** Structural analysis on the formation of the ternary complex mode-3.3.1

---

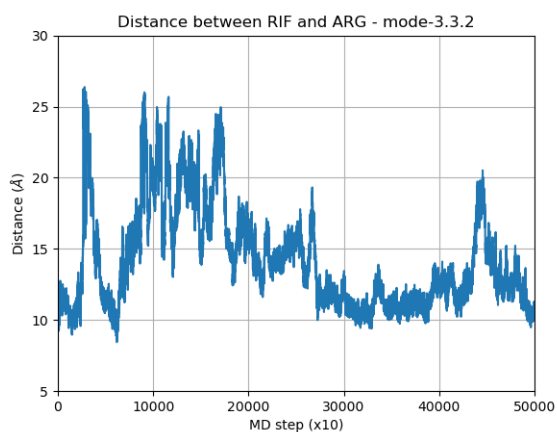

(a) *Distance between RIF and ARG in the ternary complex mode-3.3.2*

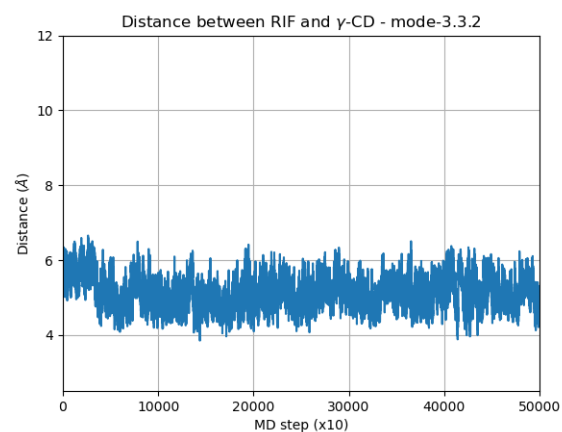

(b) *Distance between RIF and  $\gamma$ -CD in the ternary complex mode-3.3.2*

**Figure S12:** Structural analysis on the formation of the ternary complex mode-3.3.2

---

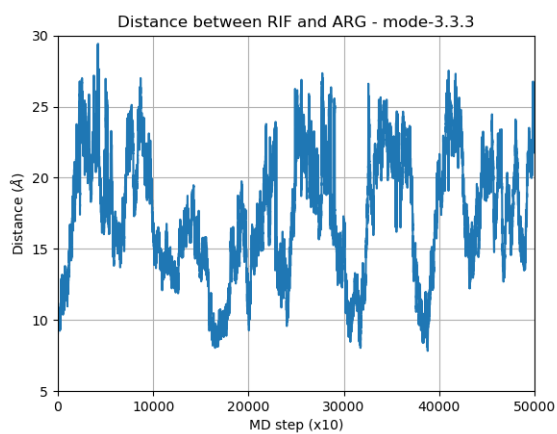

(a) *Distance between RIF and ARG in the ternary complex mode-3.3.3*

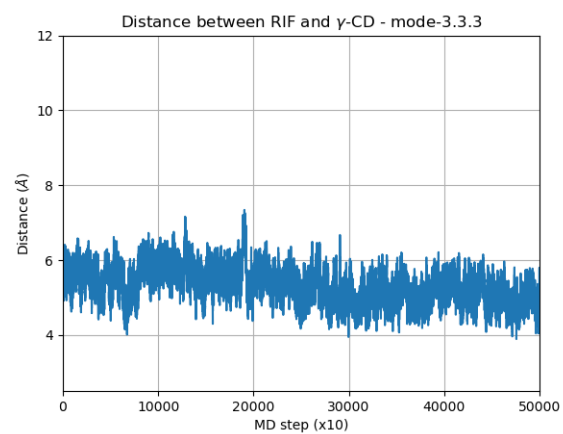

(b) *Distance between RIF and  $\gamma$ -CD in the ternary complex mode-3.3.3*

**Figure S13:** Structural analysis on the formation of the ternary complex mode-3.3.3

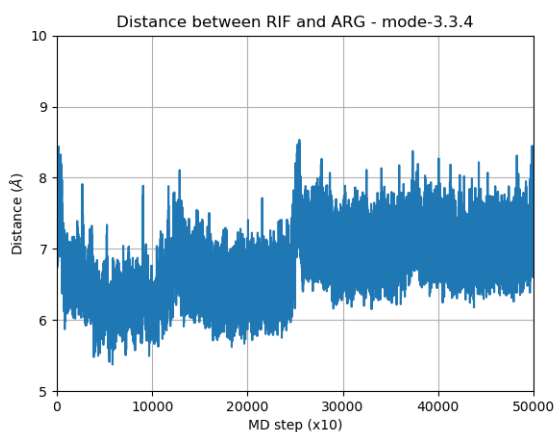

(a) *Distance between RIF and ARG in the ternary complex mode-3.3.4*

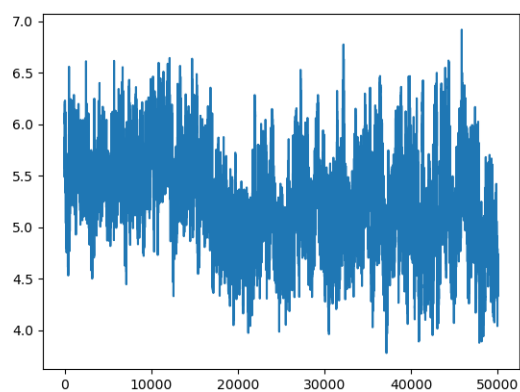

(b) *Distance between RIF and  $\gamma$ -CD in the ternary complex mode-3.3.4*

**Figure S14:** Structural analysis on the formation of the ternary complex mode-3.3.4

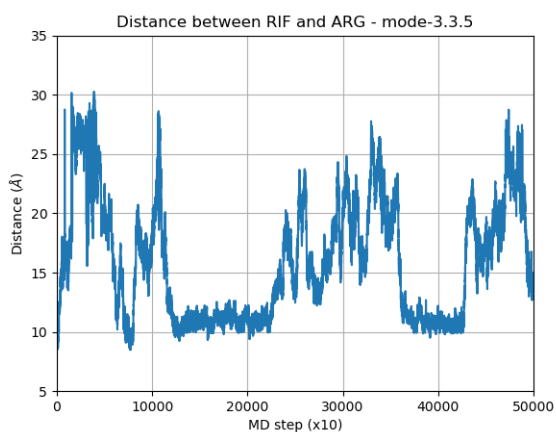

(a) *Distance between RIF and ARG in the ternary complex mode-3.3.5*

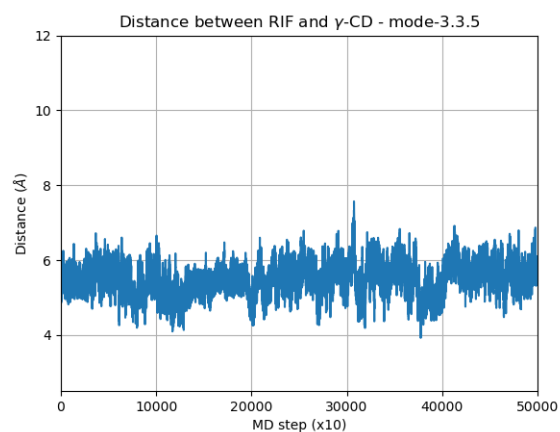

(b) *Distance between RIF and  $\gamma$ -CD in the ternary complex mode-3.3.5*

**Figure S15:** Structural analysis on the formation of the ternary complex mode-3.3.5

---

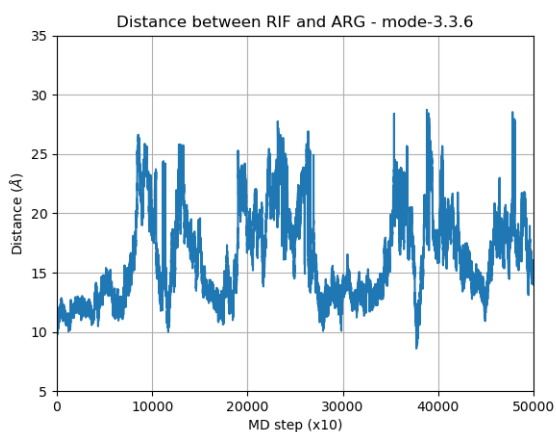

(a) *Distance between RIF and ARG in the ternary complex mode-3.3.6*

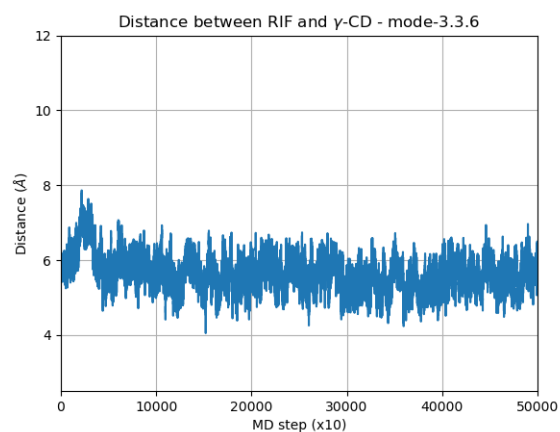

(b) *Distance between RIF and  $\gamma$ -CD in the ternary complex mode-3.3.6*

**Figure S16:** Structural analysis on the formation of the ternary complex mode-3.3.6

---



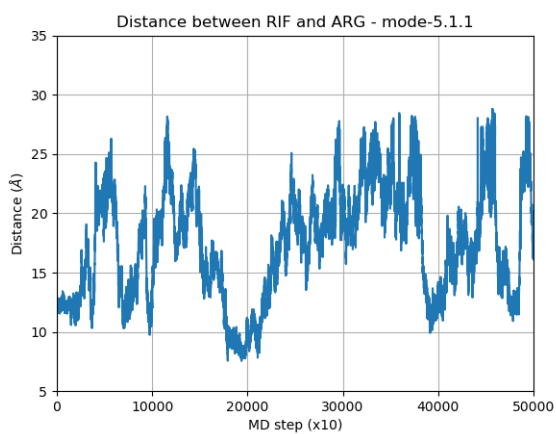

(a) *Distance between RIF and ARG in the ternary complex mode-5.1.1*

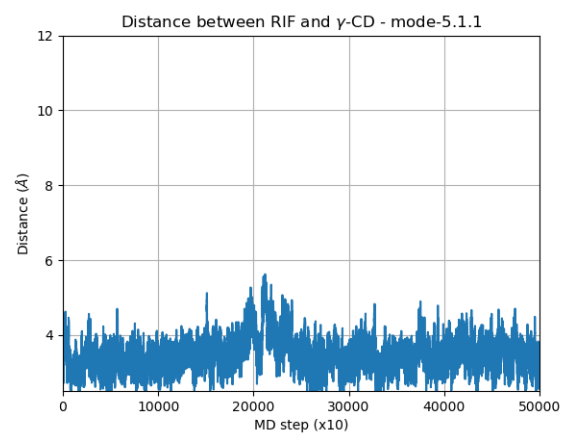

(b) *Distance between RIF and  $\gamma$ -CD in the ternary complex mode-5.1.1*

**Figure S17:** Structural analysis on the formation of the ternary complex mode-5.1.1

---

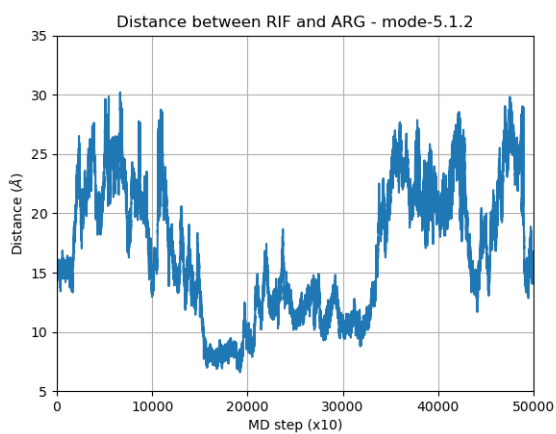

(a) *Distance between RIF and ARG in the ternary complex mode-5.1.2*

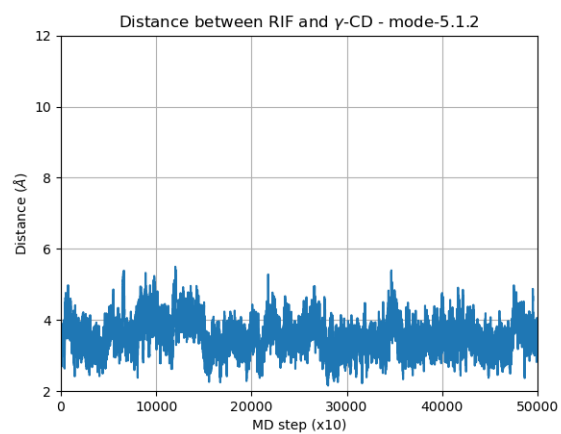

(b) *Distance between RIF and  $\gamma$ -CD in the ternary complex mode-5.1.2*

**Figure S18:** Structural analysis on the formation of the ternary complex mode-5.1.2

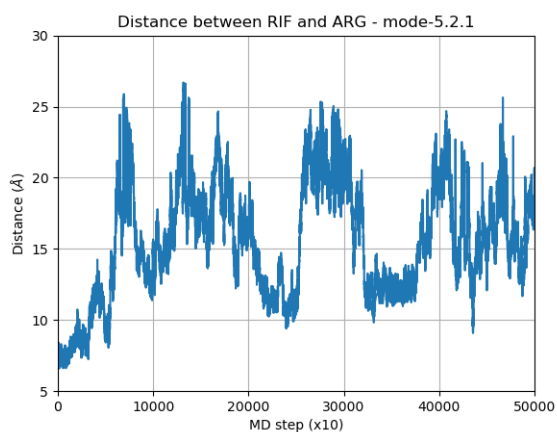

(a) *Distance between RIF and ARG in the ternary complex mode-5.2.1*

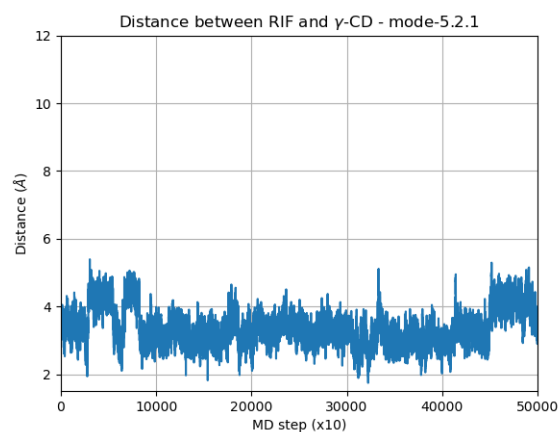

(b) *Distance between RIF and  $\gamma$ -CD in the ternary complex mode-5.2.1*

**Figure S19:** Structural analysis on the formation of the ternary complex mode-5.2.1

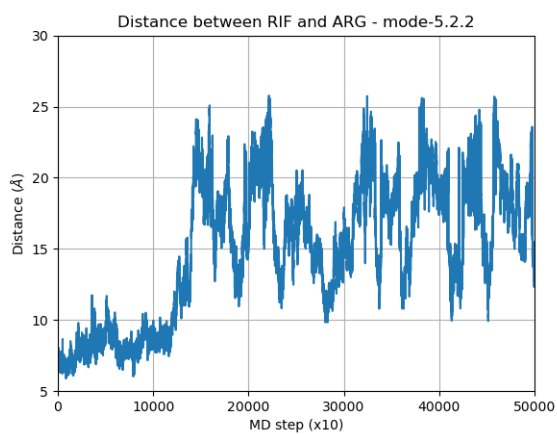

(a) *Distance between RIF and ARG in the ternary complex mode-5.2.2*

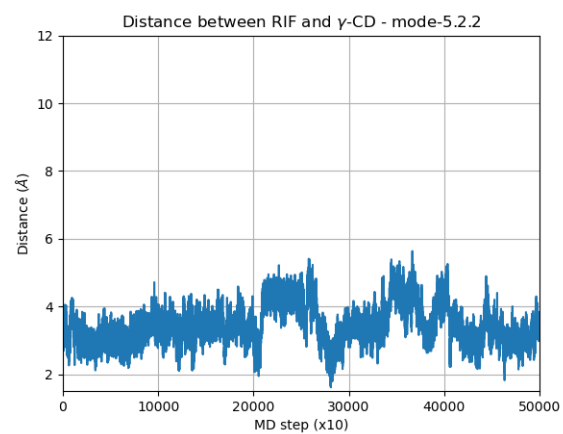

(b) *Distance between RIF and  $\gamma$ -CD in the ternary complex mode-5.2.2*

**Figure S20:** Structural analysis on the formation of the ternary complex mode-5.2.2

---

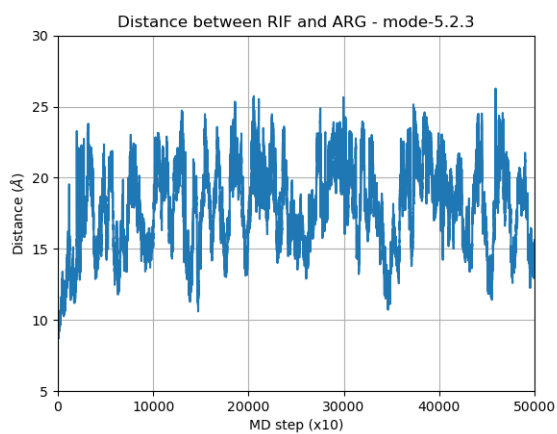

(a) *Distance between RIF and ARG in the ternary complex mode-5.2.3*

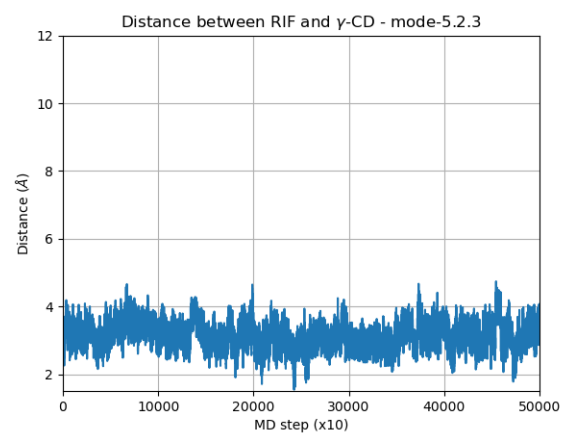

(b) *Distance between RIF and  $\gamma$ -CD in the ternary complex mode-5.2.3*

**Figure S21:** Structural analysis on the formation of the ternary complex mode-5.2.3

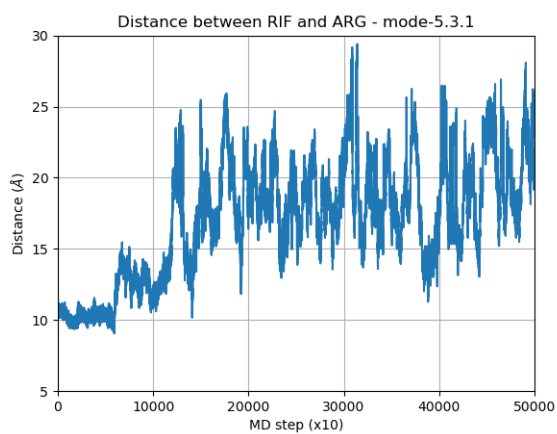

(a) *Distance between RIF and ARG in the ternary complex mode-5.3.1*

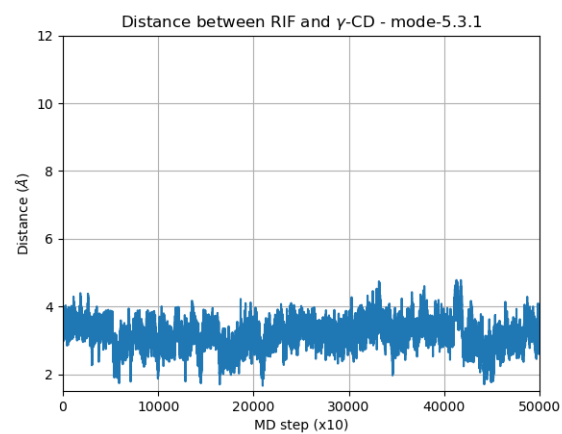

(b) *Distance between RIF and  $\gamma$ -CD in the ternary complex mode-5.3.1*

**Figure S22:** Structural analysis on the formation of the ternary complex mode-5.3.1

---

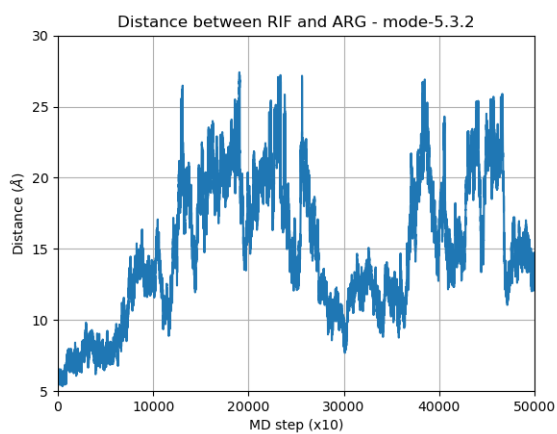

(a) *Distance between RIF and ARG in the ternary complex mode-5.3.2*

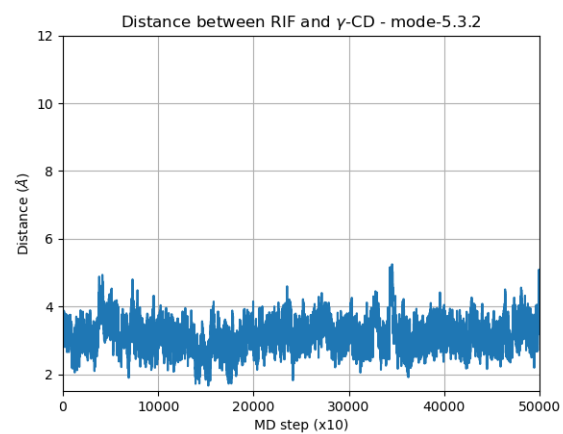

(b) *Distance between RIF and  $\gamma$ -CD in the ternary complex mode-5.3.2*

**Figure S23:** Structural analysis on the formation of the ternary complex mode-5.3.2

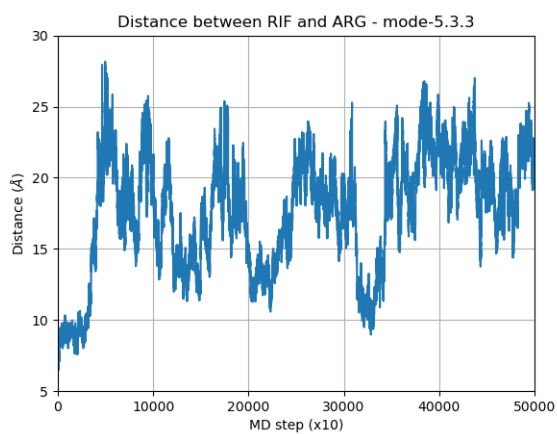

(a) *Distance between RIF and ARG in the ternary complex mode-5.3.3*

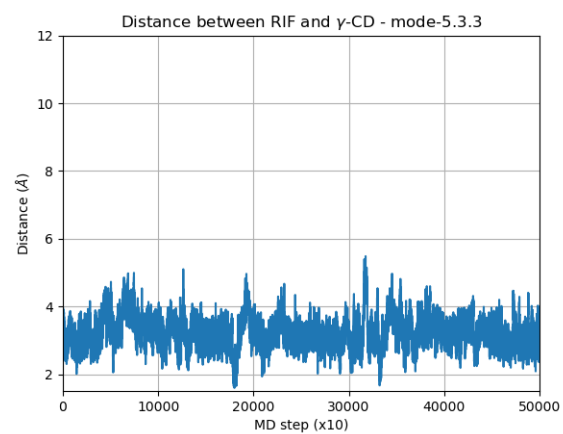

(b) *Distance between RIF and  $\gamma$ -CD in the ternary complex mode-5.3.3*

**Figure S24:** Structural analysis on the formation of the ternary complex mode-5.3.3



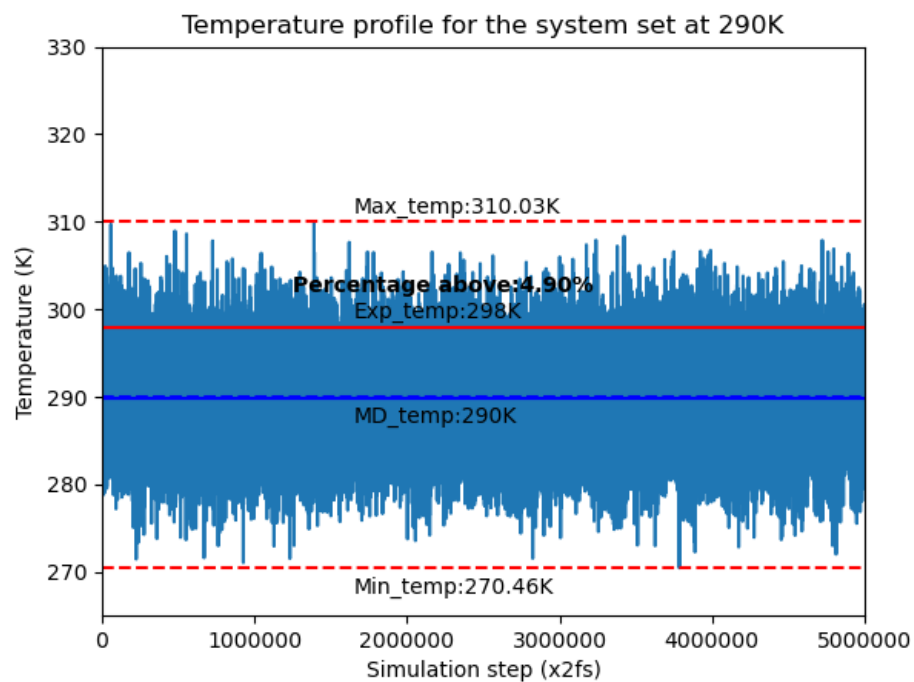

**Figure S25:** Temperature profile for the  $\gamma$ -CD systems set at 290K.

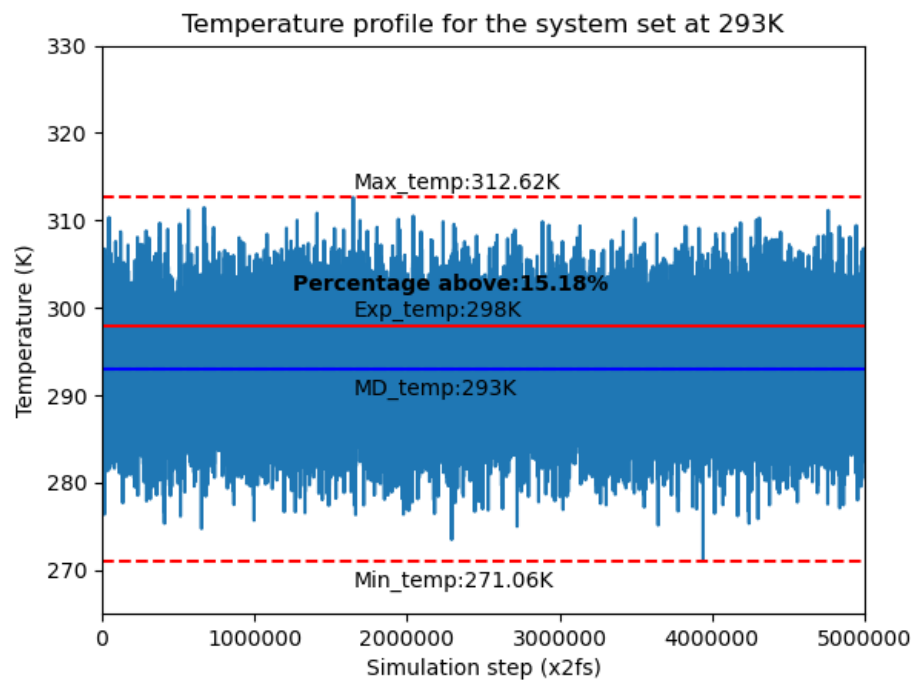

**Figure S26:** Temperature profile for the  $\gamma$ -CD systems set at 293K.

---

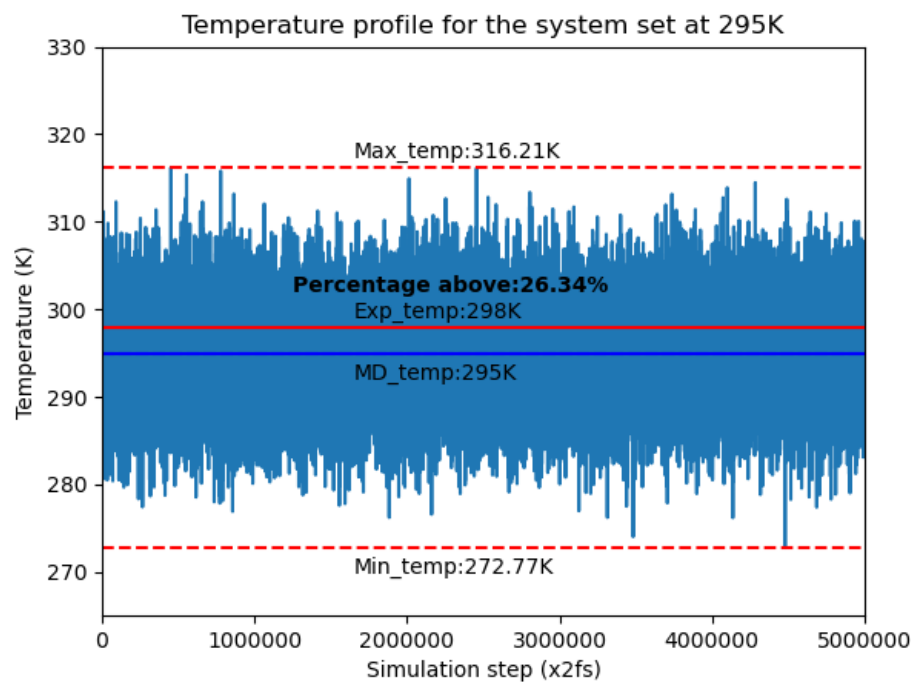

**Figure S27:** Temperature profile for the  $\gamma$ -CD systems set at 295K.

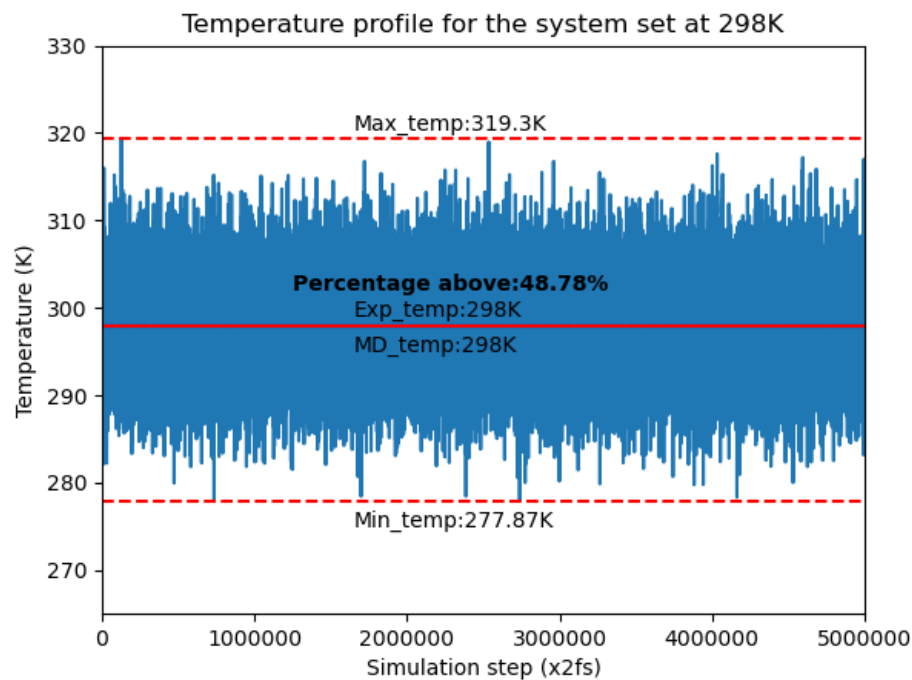

**Figure S28:** Temperature profile for the  $\gamma$ -CD systems set at 298K.

---

**Table S1.** Chemical shift for the RIF,  $\gamma$ -CD and ARG in free and complex forms.

| <sup>1</sup> H-NMR signals | Pure components                             | Binary and multicomponent systems              |                                                |                                                |
|----------------------------|---------------------------------------------|------------------------------------------------|------------------------------------------------|------------------------------------------------|
|                            |                                             | RIF:ARG                                        | RIF: $\gamma$ -CD                              | RIF: $\gamma$ -CD:ARG                          |
| RIF protons                | $\delta$ RIF <sub>free</sub> (ppm)          | $\delta$ RIF <sub>complex</sub> (ppm)          | $\delta$ RIF <sub>complex</sub> (ppm)          | $\delta$ RIF <sub>complex</sub> (ppm)          |
| H33                        | -0.2065                                     | -0.2465                                        | -0.2523                                        | -0.2600                                        |
| H31                        | 0.6175                                      | 0.5910                                         | 0.5920                                         | -0.5530                                        |
| H32                        | 0.9680                                      | 0.9390                                         | 0.9370                                         | 0.9010                                         |
| H26                        | 1.1240                                      | 1.2100                                         | 1.1935                                         | 1.1670                                         |
| H24                        | 1.4210                                      | 1.3850                                         | 1.3755                                         | 1.3565                                         |
| H13                        | 1.8250                                      | 1.7950                                         | 1.7610                                         | 1.6920                                         |
| H22                        | 1.8735                                      | 1.8910                                         | 1.8675                                         | 1.9580                                         |
| H14                        | 2.0500                                      | 2.0210                                         | 2.0310                                         | 2.0070                                         |
| H30                        | 2.0550                                      | 2.0420                                         | 2.0110                                         | 2.0110                                         |
| H36                        | 2.1220                                      | 2.0910                                         | 2.0860                                         | 2.0590                                         |
| H20                        | 2.3980                                      | 2.3725                                         | 2.3735                                         | 2.3285                                         |
| H4'                        | 2.6610                                      | 2.6970                                         | 2.7890                                         | 2.4140                                         |
| H37                        | 3.0640                                      | 3.0320                                         | 3.0305                                         | 3.0090                                         |
| H3'-H5'                    | 3.1115                                      | 3.1100                                         | 3.0895                                         | 3.0430                                         |
| H2'-H6'                    | 3.3140                                      | 3.2390                                         | 3.2340                                         | 3.2825                                         |
| H27                        | 3.4745                                      | 3.4450                                         | 3.4410                                         | 3.4020                                         |
| H21                        | 3.8440                                      | 3.8130                                         | 3.8500                                         | 3.8700                                         |
| H28                        | 5.1605                                      | 5.1430                                         | 5.1660                                         | 5.0810                                         |
| H19                        | 6.1875                                      | 6.1810                                         | 6.1810                                         | 6.1030                                         |
| H29                        | 6.3650                                      | 6.4555                                         | 6.3385                                         | 6.2930                                         |
| H17                        | 6.4780                                      | 6.4985                                         | 6.4655                                         | 6.4065                                         |
| H18                        | 6.8505                                      | 6.8540                                         | 6.9155                                         | 6.7675                                         |
| H1'                        | 8.0550                                      | 8.0370                                         | 8.0720                                         | 8.0010                                         |
| $\gamma$ -CD protons       | $\delta$ $\gamma$ -CD <sub>free</sub> (ppm) | $\delta$ $\gamma$ -CD <sub>complex</sub> (ppm) | $\delta$ $\gamma$ -CD <sub>complex</sub> (ppm) | $\delta$ $\gamma$ -CD <sub>complex</sub> (ppm) |
| H4                         | 3.5855                                      | -                                              | 3.5875                                         | 3.5620                                         |
| H2                         | 3.6480                                      | -                                              | 3.6465                                         | 3.6100                                         |
| H5-H6                      | 3.8660                                      | -                                              | 3.8520                                         | 3.7900                                         |
| H3                         | 3.9310                                      | -                                              | 3.9270                                         | 3.8950                                         |
| H1                         | 5.1055                                      | -                                              | 5.0995                                         | 5.5085                                         |
| ARG protons                | $\delta$ ARG <sub>free</sub> (ppm)          | $\delta$ ARG <sub>complex</sub> (ppm)          | $\delta$ ARG <sub>complex</sub> (ppm)          | $\delta$ ARG <sub>complex</sub> (ppm)          |
| H4-H3                      | 1.7605                                      | 1.7950                                         | -                                              | 1.8000                                         |
| H5                         | 3.2375                                      | 3.2390                                         | -                                              | 3.1965                                         |
| H2                         | 3.4800                                      | 3.4550                                         | -                                              | 3.4015                                         |
